# Supplementary material
Source: Springer Nature journal article supplement (https://www.springermedizin.de/resource/supplementary/12911_2009_304_MOESM6_ESM.pdf/9525492)

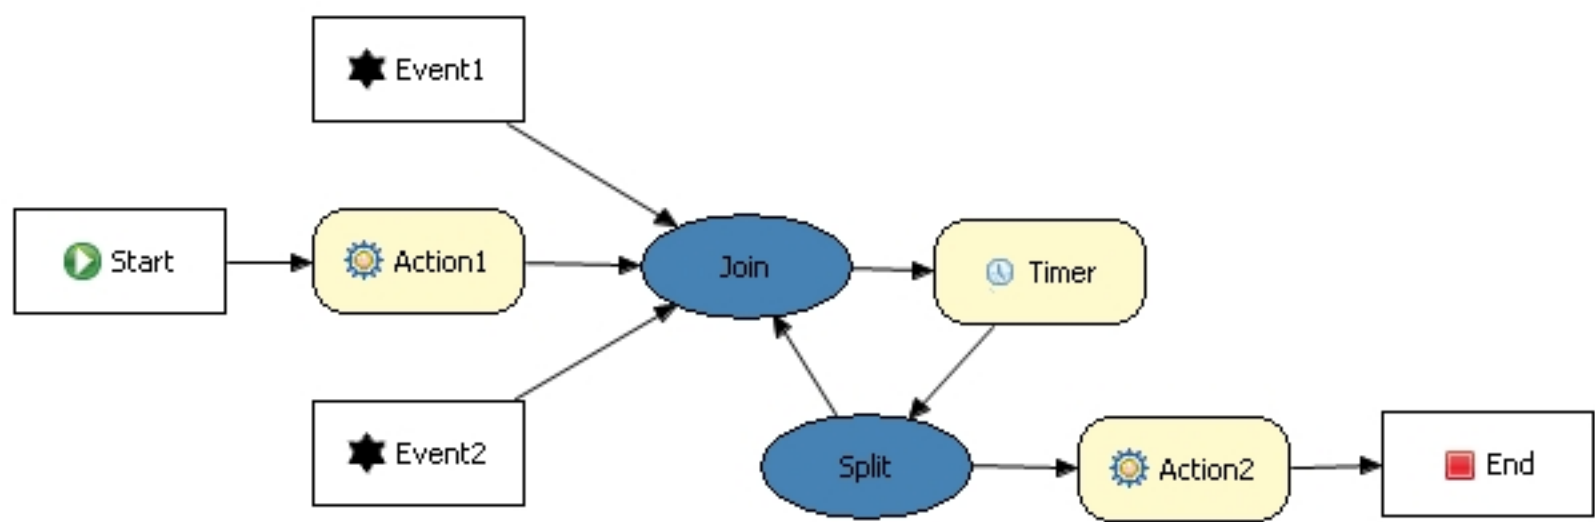

Supplement: MOESM6 [file 9525492]
